# Supplementary material for: Dissipation Behavior and Dietary Risk Assessment of Thiamethoxam, Pyraclostrobin, and Their Metabolites in Home-Style Pickled Cowpea
Source: MDPI journal article supplement (doi:10.3390/foods12183337), 2023-09-06
Supplement: s1 [file s1]

---

### Supplementary Materials:

Table S1. Mass spectrometry parameters of THI, CLO, PYR, BF 500-3.

| Compound Name | Retention time (min) | Parent (m/z) | Daughter (m/z)        | Cone (v) | Collision (v) |
|---------------|----------------------|--------------|-----------------------|----------|---------------|
| THI           | 1.11                 | 292.0000     | 132.0000              | 25       | 20            |
|               |                      | 292.0000     | 211.2000 <sup>*</sup> | 25       | 15            |
| CLO           | 1.13                 | 250.1000     | 168.8700 <sup>*</sup> | 24       | 12            |
|               |                      | 250.1000     | 131.8600              | 24       | 14            |
| PYR           | 1.46                 | 388.0500     | 163.2000 <sup>*</sup> | 18       | 28            |
|               |                      | 388.0500     | 194.2500              | 18       | 12            |
| BF 500-3      | 1.47                 | 357.9681     | 132.0170 <sup>*</sup> | 18       | 36            |
|               |                      | 357.9681     | 164.0662              | 18       | 14            |
